1     **Application of Pedimap — a pedigree visualization tool — to facilitate the**  
2                     **decisioning of rice breeding in Sri Lanka**

3     P.G.R.G. Rathnayake<sup>1</sup>, S.M. Sahibdeen<sup>1</sup>, U.A.K.S. Udawela<sup>2</sup>, C.K. Weebadde<sup>3</sup>, W.M.W. Weerakoon<sup>4</sup>, S.D.S.S.  
4                                             Sooriyapathirana<sup>1,5\*</sup>

5     <sup>1</sup>Department of Molecular Biology and Biotechnology, Faculty of Science, University of Peradeniya,  
6     Peradeniya, Sri Lanka

7     <sup>2</sup>Rice Research and Development Institute, Bathalagoda, Sri Lanka

8     <sup>3</sup>Department of Plant, Soil and Microbial Sciences, College of Agriculture and Natural Resources, Michigan  
9     State University, East Lansing, MI, USA.

10    <sup>4</sup>Department of Agriculture, Peradeniya, Sri Lanka.

11    <sup>5</sup>Postgraduate Institute of Science, University of Peradeniya, Peradeniya, Sri Lanka

12

13    \*Corresponding author:

14    sunethuop@gmail.com (SDSSS)

15

## 16 **ABSTRACT**

17 The development of rice cultivars with desirable traits is essential. The decision-making is a  
18 crucial step in rice breeding programs. The breeders can make efficient and pragmatic decisions  
19 if an organized pedigree visualization platform is available for the material of the rice breeding  
20 germplasm. The staple food in Sri Lanka is rice, and there is a great demand for improved  
21 varieties with high yield and other promising traits. In the present study, the available data of  
22 all the rice varieties released by Rice Research and Development Institute, Sri Lanka, and the  
23 related landraces and genotypes were arranged in Pedimap, a pedigree visualization tool.  
24 Pedimap can showcase pedigree relationships, phenotypic, and molecular data. The Identity by  
25 Descent (IBD) probabilities were calculated using FlexQTL software and included in the  
26 Pedimap database. The parentage selection based on the variations of phenotypic traits,  
27 selection of marker alleles for molecular breeding, and detection of the founders of genetic  
28 effects can be swiftly conducted using Pedimap. However, the power of harnessing the value  
29 of Pedimap for making breeding decisions relies on the availability of data for the traits,  
30 markers, and genomic sequences. Thus, it is imperative to characterize the breeding  
31 germplasms using standard phenomic and genomic characterization procedures before  
32 organized into Pedimap. Thereby, the worldwide breeding programs can benefit from each  
33 other to produce improved varieties to meet global challenges.

34

35 **Keywords:** Breeding database, Breeding decisions, Marker assisted breeding, Pedigree  
36 visualization, Planning crosses

37

38

39

40

## 41 INTRODUCTION

42 Rice is one of the major crops in the world, with an annual production over 700 million metric  
43 tons [1]. Half of the world population consumes rice as the staple food [2]. Currently, the  
44 demand for rice is rapidly increasing due to the growth of the human population [3]. However,  
45 the current rice production cannot meet the increasing demand causing severe food security  
46 issues. The biotic and abiotic stresses also exert a negative influence on rice production [4].  
47 The rice farming is also a way of living for many people, especially in numerous Asian  
48 countries [5]. At present, 1.8 million Sri Lankan families engage in rice farming over 870,000  
49 hectares [6]. The annual rice production in Sri Lanka is approximately 2.3 million metric tons  
50 (MT), which is insufficient to fulfill the domestic rice demand of 3.0 million [7]. Hence, the  
51 Sri Lankan government spends about USD 400 million to import rice annually [7,8].

52

53 The rice production is mainly affected by drought and irregular rainfall patterns caused by  
54 climate change [9,10,11], adverse soil conditions such as salinity [6,12], and pest and disease  
55 attacks [13]. The biotic and abiotic stresses in rice farming can be controlled using numerous  
56 agronomic practices such as irrigation, drainage, fertilization, and the application of pesticides.  
57 However, the rate of success of the controlling methods is limited [13] due to the unpredictable  
58 nature of climate change, soil degradation, variations in pest dynamics, and development of  
59 pest resistance [14]. Therefore, breeding is considered as the most successful strategy to  
60 produce high yielding and stress resilient rice varieties [15]. The improved rice genotypes can  
61 also contain the traits for higher consumer preference and organic farming [16]. In the past, the  
62 rice varietal improvement was conducted with classical breeding techniques, which are tedious,  
63 lengthy, and less feasible in cases such as breeding for pest resistance and submergence  
64 tolerance. However, the marker-assisted breeding (MAB) is employed in modern breeding  
65 programs to introgress valuable genetic loci from landraces and traditional varieties [17,18]

66 and the desirable haplotypes of Quantitative Trait Loci (QTL) to the improved rice varieties  
67 [19-21].

68

69 The decision-making process in a breeding program is crucial for successful outcomes. The  
70 formulation of decisions before breeding is a multi-step process that consists of the  
71 identification of breeding priorities, determination of the genetics of target traits, and  
72 employment of pre-breeding methods if required. The economic and technical feasibility,  
73 number of parents for crosses, number of selfing and outcrossing cycles, length of the breeding  
74 program/cycles, and identification of the selection methods must also be assessed [22]. In the  
75 decisioning process, initially, the market trends based on consumer and other stakeholder  
76 preferences must be recognized [23]. Subsequently, the novelty and the uniqueness of the  
77 breeding objective must be assessed before the execution of the breeding program [22].

78

79 The selection of suitable varieties or individual plants as parents and the determination of the  
80 selection methods are the two most critical aspects in planning breeding programs [24]. The  
81 parental selection depends on the number of prioritized traits for breeding. When multiple  
82 characteristics are to be introgressed, the breeders require a prioritized order of parents for  
83 stepwise crossing and selection [25,26]. The decision-making process in breeding is entirely  
84 based on the available information on phenotypes, genotypes, pedigree, available budget, field  
85 and greenhouse space, desired time-to-market etc. Although the data for decision-making for  
86 breeding are indispensable, haphazardly collected information would provide less value to the  
87 breeders. In many conventional breeding programs, most of the data are recorded in field  
88 notebooks and stored in the breeding stations, while very little information is available as  
89 computerized databases. If an organized database containing all the essential information for

90 the rice varieties released and the parental genotypes used in breeding, the decisions can be  
91 easily made.

92

93 The construction of a database with all the necessary information from varieties and their  
94 parents promotes the capacity of data sharing, mining, visualization, and retrieval [27].

95 Pedimap is a pedigree visualization software. The data needed can be imported to Pedimap

96 from FlexQTL, or with some custom script from any other database program. Pedimap is used

97 by many contemporary plant genetics and breeding programs worldwide. As stated in Voorrips

98 et al. (2012) [28], Pedimap can be used to record and utilize breeding history. Pedimap

99 illustrates the available phenotypic and genetic data through pedigrees. All the information,

100 including parentage, qualitative and quantitative data, marker alleles/genotypes, and the

101 calculated identity-by-descent (IBD) probabilities can be presented in Pedimap. Currently,

102 breeders prefer to use pedigree visualization tools like Pedimap since it allows them to access

103 the large pool of genetic and phenotypic data quickly and generate pedigrees that are essential

104 in making breeding decisions.

105

106 In Sri Lanka, Rice Research and Development Institute (RRDI) is the sole organization

107 conducting the rice breeding programs for the national needs. Therefore, in the present study,

108 we report an attempt to organize the information of the released varieties and the parental

109 genotypes of RRDI breeding programs as a Pedimap based database which is a valuable step

110 to take accurate breeding decisions and speed up the process of releasing novel varieties.

111

112

113

## 114 MATERIALS AND METHODS

### 115 Data Curation

116 The data were collected from RRDI, Sri Lanka and classified under three main categories,  
117 namely pedigree history, phenotypic data, and molecular data on rice  
118 varieties/landraces/genotypes (herein after collectively referred to as cultivars). The male and  
119 female parents and the order of crosses were taken under pedigree history. The average yield  
120 of the rice plants, the maturity period in different growing seasons (*Yala* and *Maha* seasons of  
121 Sri Lanka [29]), plant height, basal leaf sheath color and additional color patterns,  
122 recommended type of the land, level of phosphorus deficiency tolerance, amount of brown rice  
123 recovery, milling recovery, head rice recovery, amylose content, gelatinization temperature,  
124 weight of 1000 grains, shape of the grain, pericarp color, weight of a kg, color of the buff coat  
125 and resistance/susceptibility to pests and diseases; brown planthopper (BPH), bacterial leaf  
126 blight and rice blast disease were recorded under phenotypic data (S1 Table). The available  
127 DNA marker alleles, marker positions in the linkage map, and allelic scores were entered under  
128 molecular data [30-33] (S2 Table).

129

### 130 Pedimap Procedure

131 A Pedimap input data file is created in MS Excel (2019), and the data file is exported as a tab-  
132 delimited text (.txt) file (S3 Table). The input file contains four main subdivisions; header,  
133 pedigree, marker data, and IBD probability section (Fig 1). The header consists of five essential  
134 elements and one additional element. The name of the population and symbols for unavailable  
135 or missing data, null homozygous alleles, and confirmed null alleles are entered to the pedigree  
136 section, as shown in Fig 1A. The name of the cultivar must be a string with text or numerical  
137 values without spaces.

138 Next to the header, the pedigree section is entered, as shown in Fig 1B. The first column denotes  
139 the name of the variety or landrace, and second and third columns are reserved for maternity  
140 and paternity information, respectively. The numbers and strings can be included to represent  
141 the phenotypes in the first three columns. From the fourth column onwards, any desirable  
142 quantitative or qualitative trait values can be entered. All the collected phenotypic data are  
143 introduced, as shown in Fig 1B. The third section of the input data file is for marker  
144 information. The linkage group of the DNA marker and the marker positions in the linkage  
145 map are entered, as shown in Fig 1C. If there are more than one linkage group, all the linkage  
146 group maps should be defined successively before entering the allelic scores. The detailed data  
147 for each DNA marker can be inserted after revealing the map positions. The respective number  
148 of columns, according to the ploidy level, should be incorporated to enter allelic scores. The  
149 fourth section is for IBD probability values (Fig 1C). The IBD probabilities cannot be  
150 calculated within Pedimap but can be calculated using other software *e.g.* FlexQTL [34], which  
151 is a software for QTL analysis. FlexQTL can also generate a complete Pedimap input data file.

152

### 153 **Demonstration of the Usability of Pedimap**

154 We used the examples 1 and 2 given in Table 1 to show how parental cultivars can be selected  
155 for crossing based on diverse breeding objectives and the prioritized traits. The example 3 in  
156 Table 1 was used to select parents, indicate the DNA marker allelic representation for MAB,  
157 identity by descent calculations, and planning crosses to deduce related details necessary for  
158 decision-making for breeding.

159

160

161

162

163 **Table 1. The examples used to demonstrate the use of Pedimap in making breeding decisions.**

| Example | Trait*                                                    |                        |                                                              |                                            |                                            |                                                           |
|---------|-----------------------------------------------------------|------------------------|--------------------------------------------------------------|--------------------------------------------|--------------------------------------------|-----------------------------------------------------------|
|         | Priority# 1                                               | Priority 2             | Priority 3                                                   | Priority 4                                 | Priority 5                                 | Priority 6                                                |
| 1       | White pericarp                                            | Yield $\geq$ 3.5 mt/ha | Resistance or moderate resistance to brown planthopper (BPH) | Maturity period $\leq$ 125 days            | Grain shape <sup>§</sup>                   | -                                                         |
| 2       | High, high-intermediate, and intermediate amylose content | Yield $\geq$ 3.5 mt/ha | Maturity period $\leq$ 125 days                              | Resistance or moderate resistance to blast | -                                          | -                                                         |
| 3       | Phosphorous deficiency tolerance                          | Yield $\geq$ 5.0 mt/ha | Maturity period 90-105 days                                  | Resistance or moderate resistance to BPH   | Resistance or moderate resistance to blast | High, high-intermediate, and intermediate amylose content |

164 \*The trait classes and records are from RRDI records [35].

165 #The traits are given in the order of priority in making breeding decisions.

166 <sup>§</sup>Variable grain shapes of the intended varieties to be released.

167  
168 **Fig 1** The input data file structure of the Pedimap; The input file was created as an MS Excel  
169 worksheet, contains four main sections. A: Header, B: Pedigree and phenotypic data, C:  
170 Genotypic data. A: In the header section, essential elements are highlighted in blue, which  
171 contains the population name, ploidy and codes used in the data. (i): abbreviations for missing  
172 data (i.e., unknown), possible null alleles, confirmed null alleles; (ii): NALLELES is only  
173 necessary if the IBD probabilities are used, and specifies the total number of founder alleles  
174 (i.e. the number of founder times the ploidy). B: The Pedigree section contains the pedigree  
175 data of all the individuals, and any phenotypic data of the individuals. The pedigree part is  
176 highlighted in purple. (iii): founders (initial parents) are entered with missing values for their  
177 parents. Phenotypic data are entered in subsequent columns (iv). C: The Genotypic data section  
178 (if present) is divided into three parts: one part for each linkage group the genetic map (v),  
179 general information per locus (vi) and positions where IBD probabilities are calculated (vii); a  
180 part with the observed alleles per locus per individual (viii), and a part with the Identity-by  
181 Descent (IBD) probabilities per position per individual (ix). The final file must be saved as a  
182 text (.txt) file.

183  
184  
185  
186  
187  
188



## 189 RESULTS AND DISCUSSION

190 Worldwide plant genetics and breeding programs use Pedimap as the platform for maintaining  
191 breeding databases and pedigree visualization. In the RosBREED project [36], the parental and  
192 progeny identification, tracing founders, and calculation of allelic representation are conducted  
193 using Pedimap. The pedigree display of Pedimap is used to plan crosses in the Rosaceae  
194 research community [37, 38], HIDRAS project [39] and visualize of *Arabidopsis thaliana*  
195 crosses [40]. Selecting parentage, sketching out crossing schemes, estimating the probability  
196 of allelic segregation, and choosing compatible molecular markers for MAB can be achieved  
197 using Pedimap [28]. The use of Pedimap as a pedigree visualization tool for the decision-  
198 making process in rice breeding is described using three examples (Table 1).

199

### 200 **Example 1: Selecting parents for higher yield, BPH tolerance, short duration and white** 201 **pericarp with diverse grain shapes**

202 The Pedimap database rice breeding gerplasm in has a total of 224 input cultivars. There are  
203 36 intermediate genotypes such as F1 and F2 that were not reported, but we included them to  
204 complete the pedigree in Pedimap. Thus, the database has a total of 188 rice cultivars and  
205 accessions with known identities with records (S1 Fig, S1 Table). In Example 1, we considered  
206 a scheme to select accessions as parents with the parameters given in Table 1 for white pericarp,  
207 yield, BPH resistance, maturity period, and the grain shape. These thresholds defined a  
208 subpopulation of 26 cultivars (Fig 2). The variation of the yield is given in Fig 2A. According  
209 to the color shading given, the breeder can select the required parents for crossing to obtain  
210 higher yield levels. However, as shown in Fig 2B, only three cultivars show the complete  
211 resistance to BPH. If breeder plans to introgress the complete BPH resistance to the novel  
212 varieties, only Bg250, At307, and At306 are available as the sources of resistance. Fig 2C  
213 displays the variation for the maturity period. The breeder can choose the parents depending

214 on his objective for the intended maturity period for the novel varieties. Example 1 was  
215 exclusively planned to breed for white pericarp. However, the grain shape is also important as  
216 a significant quality trait to become a successful variety in the market. Fig 2D shows the  
217 variation for grain shapes for the breeder to carry out the selection. If we consider all the traits  
218 and selected At307 as a parent based on the pedigree visualization in Pedimap, At307 can  
219 provide the genetic basis for high yield, complete resistance to BPH, approximately three  
220 months for maturity and intermediate-bold shaped grains. If Bg450 was selected, the yield is  
221 still in the higher range with moderate resistance for BPH and short-round grains. However,  
222 Bg450 brings the alleles for an extended maturity period (Fig 2).

223

224 **Fig 2** The pedigree visualization for Example 1 (Parents with white pericarp, yield  $\geq 3.5$  mt/ha,  
225 moderate or complete BPH resistance, maturity period  $\leq 125$  days, and diverse grain shapes).  
226 The selected pedigree is colored separately for four traits. A: Yield; B: Degree of resistance to  
227 brown planthopper (BPH); C: Maturity period; D: Grain shape. Female and male parentages  
228 are indicated by red and purple lines, respectively. The symbol ‘×’ indicates the cross between  
229 two parents. The background colors of the cultivar-name boxes indicate the trait values, as  
230 shown in the colored legends below.

231

232 **Example 2: Selecting parents for high/high-intermediate amylose content, higher yield,**  
233 **short duration, and resistance to blast disease**

234 In Example 2, we considered a scheme to select cultivars/accessions as parents with the  
235 parameters given in Table 1 for high/high-intermediate amylose content, higher yield, short  
236 duration, and resistance to blast disease. These thresholds defined a subpopulation of 37  
237 cultivars/accessions (Fig 3). The breeder can select the high yielding, short-duration, and blast-  
238 resistant cultivars as parents from pedigrees visualized in Figs 3A, 3B, and 3C, respectively.  
239 The high, high-intermediate, and intermediate amylose contents are depicted in the pedigree  
240 given in Fig 3D. Only Bw351, At307, Bg407H, At308, and Bg252 show the complete  
241 resistance to blast (Fig 3C). However, At307 is the most promising parent with high yield (Fig  
242 3A), short duration (Fig 3B), and high amylose content (Fig 3D) along with complete resistance

243 to blast (Fig 3C). Also, Bg407H is the highest yielding (Fig 3A), blast-resistant (Fig 3C), and  
244 high in amylose content (Fig 3D). However, Bg407H is a long duration variety compared to  
245 At307. Therefore, the breeder may plan to cross At307 and Bg407H to accomplish the breeding  
246 objective of Example 2.

247

248 **Fig 3** The pedigree visualization for Example 2 (parents with high, high-intermediate, and  
249 intermediate amylose content, yield  $\geq 3.5$  mt/ha, moderate or complete resistance to rice blast  
250 disease and maturity period  $\leq 125$  days). The selected pedigree is colored separately for four  
251 traits. A: Yield; B: Maturity period; C: Degree of resistance to rice blast disease; D: Amylose  
252 content. Female and male parentages are indicated by red and purple lines, respectively. The  
253 symbol ‘×’ indicates the cross between two parents, and ‘×’ inside the circle represents selfing.  
254 The background colors of the cultivar-name boxes indicate the trait values, as shown in the  
255 colored legends below.

256

257 **Example 3: Selecting parents for phosphorus deficiency tolerance, higher yield, short**  
258 **duration, resistance to both BPH and blast, and high/intermediate-high amylose content**

259 We selected a set of rice cultivars from the Pedimap database based on the availability of ranked  
260 scores for phosphorus deficiency tolerance (PDT). Twenty-four cultivars contain the PDT  
261 ranks of high, moderate, and sensitive (Fig 4A). The same set was illustrated using Pedimap  
262 for yield (Fig 4B), maturity period (Fig 4C), degree of resistance to BPH (Fig 4D) and blast  
263 (Fig 4E), and amylose content (Fig 4F). If At362 is considered as a parent, it can bring  
264 resistance to PD, and BPH, moderate resistance to blast, high yield, average maturity period,  
265 and intermediate-high amylose content. Similarly, if Bg250 is selected, it can bring moderate  
266 resistance to PD and blast, resistance to BPH, moderate yield and shortest maturity period, and  
267 high amylose content (Fig 4).

268

269 A sample crossing scheme is shown in Fig 5 to produce a rice variety with high PDT, mean  
270 yield  $\geq 5.0$  mt/ha, maturity period  $\leq 105$  days, resistant to BPH and blast disease, and higher  
271 amylose content. Since there is no reported cultivar for high PDT with complete blast resistance

272 (Fig 4), the illustrated crossing scheme in Fig 5 is proposed with two phases. In the first phase,  
273 the crossing of At362 and Bg250 followed by numerous rounds of selfing and selection of the  
274 most beneficial lines among the RILs at advanced generations would accomplish the breeding  
275 objective only without complete resistance to blast (i.e., a moderate level of blast resistance is  
276 possible). In the second phase, the selected RILs from phase 1 can be backcrossed to Bg252 as  
277 the donor parent to introgress the complete resistance to blast. The breeder can come up with  
278 diverse crossing schemes like the one given in Fig 5 to make effective decisions for breeding  
279 and maximize the resource utilization to release varieties in the shortest possible time. The  
280 breeder can select any number of parents that are needed to use as sources of resistance and  
281 other traits to start crossing. Also, the marker alleles and the IBD probabilities can be checked  
282 as illustrated in S2A Fig and S2B Fig respectively.

283

284 **Fig 4** The pedigree visualization for Example 3 (parents ranked for phosphorus deficiency  
285 tolerance). The selected pedigree is colored separately for six traits. A: PDT; B: Yield; C:  
286 Maturity period; D: Degree of resistance to BPH; E: Degree of resistance to BLAST; F:  
287 Amylose content. Female and male parentages are indicated by red and purple lines,  
288 respectively. The symbol ‘×’ indicates the cross between two parents. The background colors  
289 of the cultivar-name boxes indicate the trait values, as shown in the colored legends below. The  
290 cultivars with missing-trait values are indicated by white boxes.

291

292 **Fig 5** The pedigree visualization for planning a crossing scheme. Phase 1: Initial crossing of  
293 At362 and Bg250 and pedigree selection to obtain RILs with  $\geq 5.0$  mt/ha of mean yield,  $\leq 105$   
294 day of maturity period, resistant to BPH, moderately resistant to blast and high level of amylose  
295 content. Phase 2: Then backcrossing with Bg252 as the donor parent to introgress the blast  
296 resistance.

297

298 The decision-making process in breeding is a tedious task [22]. The breeding germplasm is  
299 complex with large numbers of improved varieties, traditional cultivars, landraces, wild  
300 germplasm and accessions. Also, there can be large mapping populations and unreleased  
301 varieties due to various reasons. The numerous genotypes in breeding germplasm may have  
302 extensive records on agronomic data, pest and disease resistance, quality traits, availability of  
303 samples, geographic locations, and utilization in diverse breeding programs as parents [41, 42].

304 With the advent of DNA markers and sequencing technologies, a wealth of genomic  
305 information is also available [43]. However, one of the recurrent problems in any breeding  
306 germplasm in the world is most of the cultivars remain uncharacterized. Thus, they cannot be  
307 used directly in breeding activities. Traditionally, breeders keep records in field books. With  
308 the development of computer technology, data tabulation is becoming a common practice.  
309 However, given the highly complex nature of the datasets in breeding germplasm, data tables  
310 have a limited value to the breeders. The tables created with contemporary data managing  
311 software cannot graphically display complex pedigrees and variations of qualitative and  
312 quantitative traits along with DNA marker information. These database handling platforms do  
313 not make use of the pedigree-based capabilities of Pedimap, like selecting related parental  
314 varieties/accessions. In this context, Pedimap provides a considerable advantage, as it can  
315 visualize pedigree relationships, trait variations, and any other useful information required for  
316 decision-making and planning crosses in breeding programs [28]. If all the available details on  
317 breeding germplasm are arranged as a database, the breeder can come up with subpopulations  
318 based on diverse traits and select the parents for improving multiple traits. However, simple  
319 spreadsheets or manually prepared note pages cannot be used to visualize the essential  
320 information and complex pedigrees. Breeding programs often suffer a lot when the breeder  
321 gets retired or moved to a different position [44-46]. The newly hired breeder cannot practically  
322 go through the individual records of the existing breeding germplasm. Thus, there is a strong  
323 possibility that valuable breeding germplasm might get lost wasting time, resources, and  
324 courage of the retired breeder and his team. However, as a routine practice, if the breeder  
325 maintains and updates a Pedimap file for the developing germplasm of breeding materials, the  
326 newly hired breeders can go through and identify the value and gaps in the available material  
327 for him to plan further. The creation of a Pedimap file is simple, and a novice to informatics  
328 can curate and use Pedimap with a little training. Pedimap allows breeders to store data, fetch

329 and visualize genomic information at any time with less effort and complete accuracy [47]. The  
330 straightforward accessibility, direct data interpretation, ability to customize the views in  
331 multiple fashions, and editable output file formats are the significant features of Pedimap. The  
332 graphic files created can be readily imported to image editing software for further visualizations  
333 and illustrations. Pedimap is not an opensource software but can be freely obtained by  
334 contacting the developers thus even the breeders in developing countries can benefit from  
335 Pedimap [28].

336

337 In the current study, we created a Pedimap database for the rice cultivars and accessions  
338 prominently used by breeding programs in Sri Lanka. With the available information,  
339 significant breeding decisions can be made as we explain in three examples (Figs 2-5).  
340 However, it is essential to characterize the cultivars for all the important traits, molecular  
341 markers and SNP haplotypes [48], so that breeding decisions can be effectively made [17]. The  
342 phenotyping methods must be standard and should follow common procedures across different  
343 locations so that the power of the Pedimap database would go up dramatically. Therefore,  
344 breeders should always follow the standard, globally acceptable phenomic platforms to  
345 characterize the material in breeding germplasm [39, 49].

346

## 347 **CONCLUSION**

348 The pedigree visualization with variations of phenotypic and molecular data using Pedimap is  
349 a user-friendly tool to plan rice breeding programs with higher accuracy and resource  
350 optimization. The present study explains the applicability of Pedimap as a decision-making  
351 tool to streamline the rice breeding programs in Sri Lanka. However, it is also important to  
352 note that accurate characterization of the breeding germplasm for phenotypic and molecular  
353 data is the critical prior step to harness the value of Pedimap for breeding.

354 **REFERENCES**

- 355 1. Food and Agriculture Organization of the United Nations (FAO). Rice market monitor.  
356 2018; 21: 1-3.
- 357 2. Muthayya S, Sugimoto JD, Montgomery S, Maberly GF. An overview of global rice  
358 production, supply, trade, and consumption. *Ann. N. Y. Acad. Sci.* 2014; 1324(1):7-14.
- 359 3. Ali AM. Rice to shrimp: Land use/land cover changes and soil degradation in  
360 Southwestern Bangladesh. *Land Use Policy.* 2006; 23(4):421-35.
- 361 4. Seck PA, Diagne A, Mohanty S, Wopereis MC. Crops that feed the world 7: Rice. *Food*  
362 *Secur.* 2012; 4(1):7-24.
- 363 5. Segal R, Le Nguyet M. *Unfair Harvest: The state of rice in Asia.* Oxford, UK: Oxfam  
364 International; 2019.
- 365 6. Rice Research and Development Institute (RRDI). Rice Cultivation. Sri Lanka:  
366 Department of Agriculture; 2019 [cited 2019 Jul 15]. Available from: [http://](http://www.doa.gov.lk/rrdi/)  
367 [www.doa.gov.lk/rrdi/](http://www.doa.gov.lk/rrdi/).
- 368 7. Central Bank of Sri Lanka. Annual Report of Central Bank of Sri Lanka. 2017 [Cited  
369 2019 May 18]. Available from: [https://www.cbsl.gov.lk/en/publications/economic-and-](https://www.cbsl.gov.lk/en/publications/economic-and-financial-reports/annual-reports/annual-report-2017)  
370 [financial-reports/annual-reports/annual-report-2017](https://www.cbsl.gov.lk/en/publications/economic-and-financial-reports/annual-reports/annual-report-2017).
- 371 8. Central Bank of Sri Lanka. Annual Report of Central Bank of Sri Lanka. 2018 [Cited  
372 2019 May 18]. Available from: [https://www.cbsl.gov.lk/en/publications/economic-and-](https://www.cbsl.gov.lk/en/publications/economic-and-financial-reports/annual-reports/annual-report-2018)  
373 [financial-reports/annual-reports/annual-report-2018](https://www.cbsl.gov.lk/en/publications/economic-and-financial-reports/annual-reports/annual-report-2018).
- 374 9. Dharmarathna WR, Herath S, Weerakoon SB. Changing the planting date as a climate  
375 change adaptation strategy for rice production in Kurunegala district, Sri Lanka.  
376 *Sustainability science.* 2014; 9(1):103-11.
- 377 10. IPCC. *Climate Change 2007: Impacts, Adaptation and Vulnerability.* Contribution of  
378 Working Group II to the Fourth Assessment Report of the Intergovernmental Panel on

- 379 Climate Change. In: Parry ML, Canziani OF, Palutikof JP, Van der Linden PJ, Hanson  
380 CE, editors. Cambridge, UK: Cambridge University Press; 2007. 976p.
- 381 11. Mackill DJ, Coffman WR, Garrity DP. Rainfed Lowland Rice Improvement. Los Banos,  
382 Philippines: International Rice Research Institute; 1996. 242p.
- 383 12. Walisinghe BR, Gunaratne LHP, Prasada DVP, Sarthaj IZ. Analysis of the consumer  
384 preferences for rice-based noodles and biscuits. *Annals of Sri Lanka Department of*  
385 *Agriculture*. 2010; 12:201-211.
- 386 13. Dhanapala MP. Bridging the rice yield gap in Sri Lanka. In Proceedings of the symposium  
387 on Expert Consultation on Bridging the Rice Yield Gap in the Asia-Pacific Region,  
388 Bangkok, Thailand; 1999 October 5–8. pp. 135–145.
- 389 14. Shetty PK. Socio-ecological implications of pesticide use in India. *Econ. Polit. Wkly.*  
390 2004; 5261-5257.
- 391 15. Duvick DN. Progress in conventional plant breeding. In *Gene manipulation in plant*  
392 *improvement*. Boston, MA: Springer; 1984. Pp. 17-31.
- 393 16. Calingacion M, Laborte A, Nelson A, Resurreccion A, Concepcion JC, Daygon VD, et  
394 al. Diversity of global rice markets and the science required for consumer-targeted rice  
395 breeding. *Plos One*. 2014; 9(1):e85106.
- 396 17. Jiang GL. Plant marker-assisted breeding and conventional breeding: challenges and  
397 perspectives. *Adv. Crop Sci. Technol*. 2013; 1:e106.
- 398 18. Sasaki T. Power of conventional rice breeding. *Breed. Sci*. 2011; 61(4):317.
- 399 19. Collard BC, Mackill DJ. Marker-assisted selection: an approach for precision plant  
400 breeding in the twenty-first century. *Philosophical Transactions of the Royal Society B:*  
401 *Biological Sciences*. 2007; 363(1491):557-572.



- 402 20. Tanksley SD, Nelson JC. Advanced backcross QTL analysis: a method for the  
403 simultaneous discovery and transfer of valuable QTLs from unadapted germplasm into  
404 elite breeding lines. *Theor. Appl. Genet.* 1996; 92(2):191-203.
- 405 21. Thomson MJ, Ismail AM, McCouch SR, Mackill DJ. Marker assisted breeding. In *Abiotic*  
406 *Stress Adaptation in Plants*. Dordrecht: Springer; 2009. pp. 451-469.
- 407 22. Acquaah G. *Principles of plant genetics and breeding*. 2nd ed. Oxford, UK: Wiley-  
408 Blackwell; 2012. pp. 281-334.
- 409 23. Clark BH. Marketing performance measures: History and interrelationships. *Journal of*  
410 *marketing management*. 1999; 15(8):711-32.
- 411 24. Ragot M, Bonierbale M, Weltzien E. From Market Demand to Breeding Decisions: A  
412 Framework. Lima (Peru). CGIAR Gender and Breeding Initiative. GBI Working Paper.  
413 No. 2 [Internet]. 2008 [cited 2019 Jul 25]. Available from: [https://www.rtb.cgiar.org/](https://www.rtb.cgiar.org/gender-breeding-initiative)  
414 [gender-breeding-initiative](https://www.rtb.cgiar.org/gender-breeding-initiative).
- 415 25. Kariuki CM, van Arendonk JA, Kahi AK, Komen H. Multiple criteria decision-making  
416 process to derive consensus desired genetic gains for a dairy cattle breeding objective for  
417 diverse production systems. *Journal of dairy science*. 2017; 100(6):4671-82.
- 418 26. Velasquez M, Hester PT. An analysis of multi-criteria decision-making methods.  
419 *International Journal of Operations Research*. 2013; 10(2):56-66.
- 420 27. Yu J, Jung S, Cheng CH, Ficklin SP, Lee T, Zheng P, et al. CottonGen: a genomics,  
421 genetics and breeding database for cotton research. *Nucleic Acids Res.* 2013;  
422 42(D1):D1229-36.
- 423 28. Voorrips RE, Bink MC, van de Weg WE. Pedimap: software for the visualization of  
424 genetic and phenotypic data in pedigrees. *J. Hered.* 2012; 103(6):903-907.

- 425 29. Aluwihare YC, Ishan M, Chamikara MD, Weebadde CK, Sirisena DN, Samarasinghe  
426 WL, et al. Characterization and selection of phosphorus deficiency tolerant rice genotypes  
427 in Sri Lanka. *Rice Science*. 2016; 23(4):184-95.
- 428 30. Aluwihare YC, Chamikara MD, Dissanayake DR, Karannagoda NN, Sirisena DN,  
429 Samarasinghe WL, et al. Validation of *K46*, a *Pup1*-linked marker, using a selection of  
430 Sri Lankan rice (*Oryza sativa* L.) germplasm for marker assisted selection towards  
431 phosphorous deficiency tolerance. *Ceylon J. Sci. (Bio. Sci.)*. 2015; 44(2):45-54.
- 432 31. Jayarathne HSM, Rathnayake PGRG, Ranaweera LT, Nizam, R., Rathnayake RMSK,  
433 Kannangara SK, et al. Assessment of the variation of performance indicators under p-  
434 starved conditions in a core-set of rice cultivars and their diversity in *Pup1*-linked DNA  
435 marker-haplotypes. *J. Natl. Sci. Found. Sri*. 2019; In review.
- 436 32. Nakandala ND, Karunarathne SI, Ranaweera LT, Wijesundara WW, Senevirathna RW,  
437 Rathnayake RM, et al. Assessment of the association between yield parameters and  
438 polymorphic sites of the *Ghd7* locus in a core-set of rice cultivars grown in Sri Lanka.  
439 *Ceylon J. Sci*. 2019; 48(2):121-32.
- 440 33. Rathnayake RMSK, Rathnayake PGRG, Jayarathne HSM, Nizam R, Ranaweera LT,  
441 Kannangara SK, et al. Assessment of the Sequence-Based Haplotype-Variants in Selected  
442 DNA Marker Loci for the Molecular Breeding of Resistant Rice Varieties to Brown Plant  
443 Hopper. *Sri Lankan Journal of Agriculture and Ecosystems*. 2019; 1:2-15.
- 444 34. Bink MC, Boer MP, Ter Braak CJ, Jansen J, Voorrips RE, Van de Weg WE. Bayesian  
445 analysis of complex traits in pedigreed plant populations. *Euphytica*. 2008; 161  
446 (1-2):85-96.
- 447 35. RRDI (2018). Recommended Rice Varieties in Sri Lanka (1958-2016). Bathalagoda,  
448 Ibbagamuwa, Sri Lanka: Rice Research and Development Institute, Department of  
449 Agriculture; 2018.

- 450 36. Weebadde C, Crisosto C, Fazio G, Gallardo K, Main D, Peace C, et al. Use of PediMap  
451 in RosBREED for Visualizing Genetic and Phenotypic Data across Pedigrees in  
452 Rosaceous Crops. Hort. Science. 2010; 45, S55-S55.
- 453 37. Peace CP, Luby JJ, Van de Weg WE, Bink MC, Iezzoni AF. A strategy for developing  
454 representative germplasm sets for systematic QTL validation, demonstrated for apple,  
455 peach, and sweet cherry. Tree Genet. Genomes. 2014; 10(6):1679-1694.
- 456 38. Rosyara UR, Bink MC, van de Weg E, Zhang G, Wang D, Sebolt A, et al. Fruit size QTL  
457 identification and the prediction of parental QTL genotypes and breeding values in  
458 multiple pedigreed populations of sweet cherry. Mol. Breeding. 2013; 32(4):875-87.
- 459 39. Evans K, Guan Y, Luby J, Clark M, Schmitz C, Brown S, et al. Large-scale standardized  
460 phenotyping of apple in RosBREED. Acta Hort. 2012; 945:233-238.
- 461 40. Paulo MJ, Boer M, Huang X, Koornneef M, Van Eeuwijk F. A mixed model QTL analysis  
462 for a complex cross population consisting of a half diallel of two-way hybrids in  
463 *Arabidopsis thaliana*: analysis of simulated data. Euphytica. 2008; 161(1-2):107-14.
- 464 41. Davenport G, Ellis N, Ambrose M, Dicks J. Using bioinformatics to analyse germplasm  
465 collections. Euphytica. 2004; 137(1):39-54.
- 466 42. Peeters JP, Galwey NW. Germplasm collections and breeding needs in Europe. Econ.  
467 Bot. 1988; 42(4):503-521.
- 468 43. Nadeem MA, Nawaz MA, Shahid MQ, Doğan Y, Comertpay G, Yıldız M, et al. DNA  
469 molecular markers in plant breeding: current status and recent advancements in genomic  
470 selection and genome editing. Biotechnol. Equip. 2018; 32(2):261-85.
- 471 44. Sooriyapathirana SDSS, Ranaweera LT, Perera HACR, Weebadde CK, Finn CE, Bassil  
472 NV, et al. Using SNP/INDEL diversity patterns to identify a core group of genotypes  
473 from FVC<sub>11</sub>, a superior hybrid family of *Fragaria virginiana* Miller and *F. chiloensis* (L.)  
474 Miller. Genet. Resour. Crop Ev. 2019; 66(8):1691-1698.

- 475 45. USDA. USDA Roadmap for Plant Breeding March 11, 2015: Final Report. United States  
476 Department of Agriculture: Office of the Chief Scientist Research, Education, and  
477 Economics Mission Area [Internet]. 2015 [cited 2019 Jul 25]. Available from:  
478 <http://www.usda.gov/wps/portal/usda/usdahome?navid=OCS>.
- 479 46. Hmielowski T. Challenges to developing cultivars in the public sector. *Crops, Soils,*  
480 *Agronomy News.* 2017; 62(10):4-5.
- 481 47. Zhu T, Liang C, Meng Z, Sun G, Meng Z, Guo S, et al. CottonFGD: an integrated  
482 functional genomics database for cotton. *BMC Plant Biol.* 2017; 17(1):101.
- 483 48. Vanderzande S, Howard NP, Cai L, Linge CD, Antanaviciute L, Bink MC, et al. High-  
484 quality, genome-wide SNP genotypic data for pedigreed germplasm of the diploid  
485 outbreeding species apple, peach, and sweet cherry through a common workflow. *Plos*  
486 *One.* 2019; 14, e0210928.
- 487 49. Fukai S, Fischer KS. Field phenotyping strategies and breeding for adaptation of rice to  
488 drought. *Frontiers in Physiology.* 2012; 3:282.

489

## 490 **Supporting information**

491 **S1 Table** Varietal data

492 **S2 Table** Marker data

493 **S3 Table** Pedimap input data file

494 **S1 Fig** Visualization of the entire pedigree of the rice cultivars in the rice breeding germplasm  
495 of Sri Lanka. Female and male parentages are indicated by red and purple lines, respectively.  
496 The symbol ‘×’ indicates the cross between two parents, and ‘×’ inside the circle represents  
497 selfing.

498 **S2 Fig** Visualization of selected marker genotypes and Identity by Descent (IBD). A: Marker  
499 alleles. The alleles of the DNA markers K29-N, K41, K48, and K5-N are given in vertical

500 order.; B: IBD probabilities of four Pup1 linked markers. The same pedigree as in the S2A Fig  
501 is shown with precalculated IBD data for part of the Pup1 linked region on chromosome 12 at  
502 about 55 cM. Since the cultivar linkage maps are not available, we assumed a 0.1 cM gap  
503 between adjacent markers for the representation of IBD values. Each color represents a different  
504 founder, haplotype. Each rectangle represents one copy of the selected chromosome in an  
505 individual. The chromosomal position of the alleles represents the vertical bars, and the width  
506 of a color bar indicates the IBD probability of the corresponding founder alleles.

bioRxiv preprint doi: <https://doi.org/10.1101/2020.01.20.912477>; this version posted January 20, 2020. The copyright holder for this preprint (which was not certified by peer review) is the author/funder, who has granted bioRxiv a license to display the preprint in perpetuity. It is made available under aCC-BY 4.0 International license.

**A**

|   | A             | B | C                        | D | E | F | G | H | I | J | K | L | M |
|---|---------------|---|--------------------------|---|---|---|---|---|---|---|---|---|---|
| 1 |               |   |                          |   |   |   |   |   |   |   |   |   |   |
| 2 | POPULATION    | = | Sri_Lanka_Rice_Germplasm |   |   |   |   |   |   |   |   |   |   |
| 3 | UNKNOWN       | = | -                        |   |   |   |   |   |   |   |   |   |   |
| 4 | NULLHOMOZ     | = | \$                       |   |   |   |   |   |   |   |   |   |   |
| 5 | CONFIRMEDNULL | = | \$\$                     |   |   |   |   |   |   |   |   |   |   |
| 6 | PLOIDY        | = | 2                        |   |   |   |   |   |   |   |   |   |   |
| 7 | NALLELES      | = | 6                        |   |   |   |   |   |   |   |   |   |   |

**B**

|    | A        | B       | C       | D     | E        | F      | G          | H   | I  | J  | K         | L | M |
|----|----------|---------|---------|-------|----------|--------|------------|-----|----|----|-----------|---|---|
| 9  | PEDIGREE |         |         |       |          |        |            |     |    |    |           |   |   |
| 10 | NAME     | PARENT1 | PARENT2 | Yield | Maturity | Height | Leaf_color | BPH | GM | BL | PDT       |   |   |
| 11 | Bg94_1   | -       | -       | 4.1   | 105      | 55     | Green      | S   | S  | MS | High      |   |   |
| 12 | Pokkali  | -       | -       | -     | -        | -      | -          | -   | -  | -  | Moderate  |   |   |
| 13 | Bg300    | -       | -       | 5     | 93       | 72.2   | Green      | MR  | R  | MR | Sensitive |   |   |
| 14 | Bg301    | -       | -       | 6     | 93       | 67     | Green      | -   | -  | -  | -         |   |   |
| 15 | At354    | Bg94_1  | Pokkali | 6.5   | 95       | 67     | Green      | MR  | MR | S  | Sensitive |   |   |
| 16 | At401    | Bg94_1  | Pokkali | 5     | 115      | 85     | Green      | MR  | R  | MS | -         |   |   |

**C**

|    | A               | B     | C   | D   | E   | F   | G   | H | I | J | K | L | M |
|----|-----------------|-------|-----|-----|-----|-----|-----|---|---|---|---|---|---|
| 18 | LINKAGEGROUP 12 |       |     |     |     |     |     |   |   |   |   |   |   |
| 19 | MAP             |       |     |     |     |     |     |   |   |   |   |   |   |
| 20 | RM101           | 48.2  |     |     |     |     |     |   |   |   |   |   |   |
| 21 | RM277           | 62    |     |     |     |     |     |   |   |   |   |   |   |
| 22 |                 |       |     |     |     |     |     |   |   |   |   |   |   |
| 23 | LOCUS           | RM101 |     |     |     |     |     |   |   |   |   |   |   |
| 24 | ALLELENAMES     | 110   | 115 | 120 | 125 |     |     |   |   |   |   |   |   |
| 25 | FOUNDERALLELES  | 110   | 110 | 110 | 110 | 115 | 120 |   |   |   |   |   |   |
| 26 |                 |       |     |     |     |     |     |   |   |   |   |   |   |
| 27 | LOCUS           | RM277 |     |     |     |     |     |   |   |   |   |   |   |
| 28 | ALLELENAMES     | 200   | 225 | 250 | 275 | 300 |     |   |   |   |   |   |   |
| 29 | FOUNDERALLELES  | 200   | 200 | 200 | 200 | 300 | 275 |   |   |   |   |   |   |
| 30 | IBDPOSITIONS    | 48.2  | 62  |     |     |     |     |   |   |   |   |   |   |
| 31 |                 |       |     |     |     |     |     |   |   |   |   |   |   |
| 32 | ALLELES         | RM323 |     |     |     |     |     |   |   |   |   |   |   |
| 33 | Bg941           | 140   | 0   | 140 | 0   |     |     |   |   |   |   |   |   |
| 34 | Pokkali         | 160   | 0   | 180 | 0   |     |     |   |   |   |   |   |   |
| 35 |                 |       |     |     |     |     |     |   |   |   |   |   |   |
| 36 | IBDPOSITION     | 48.6  |     |     |     |     |     |   |   |   |   |   |   |
| 37 |                 |       |     |     |     |     |     |   |   |   |   |   |   |
| 38 | Bg941           | 1     | 0   | 0   | 0   | 0   | 0   | 0 | 0 | 0 | 1 |   |   |
| 39 | Pokkali         | 0     | 0   | 1   | 0   | 0   | 0   | 0 | 0 | 0 | 0 |   |   |
| 40 | At354           | 0     | 0   | 0   | 0   | 0   | 0   | 0 | 0 | 1 | 0 |   |   |
| 41 | At401           | 0     | 0   | 0   | 0   | 0   | 0   | 0 | 0 | 0 | 0 |   |   |
| 42 |                 |       |     |     |     |     |     |   |   |   |   |   |   |
| 43 | IBDPOSITION     | 62.0  |     |     |     |     |     |   |   |   |   |   |   |

Define Linkage group

Figure 1

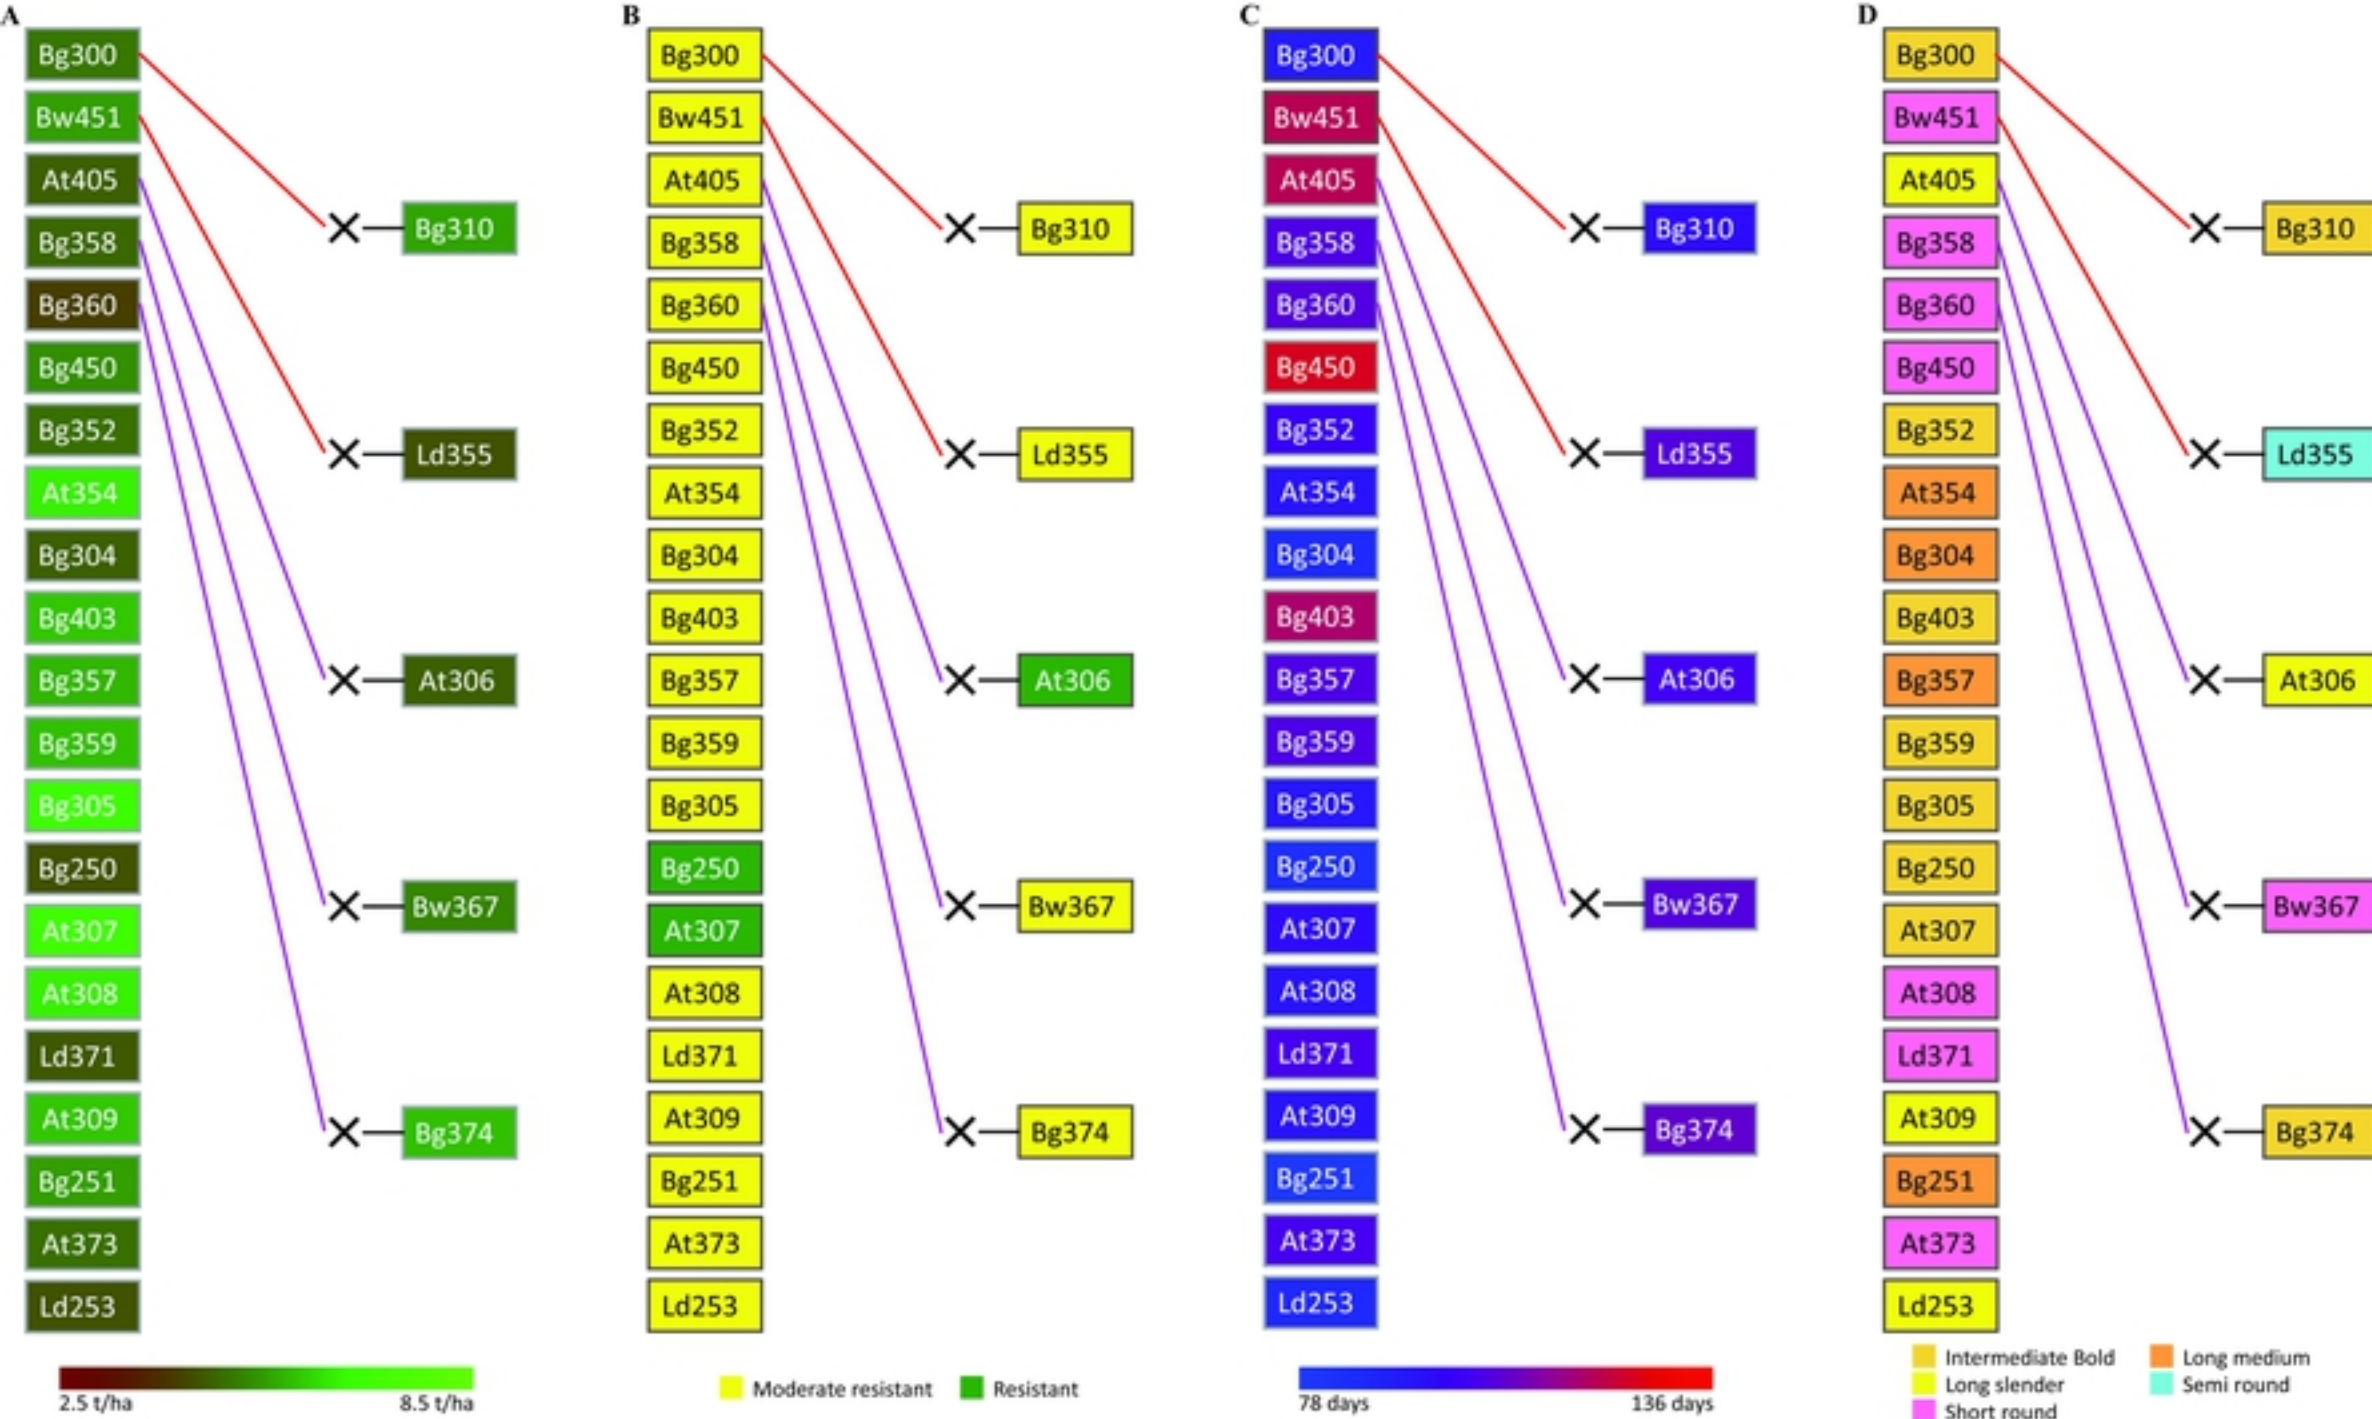

Figure 2

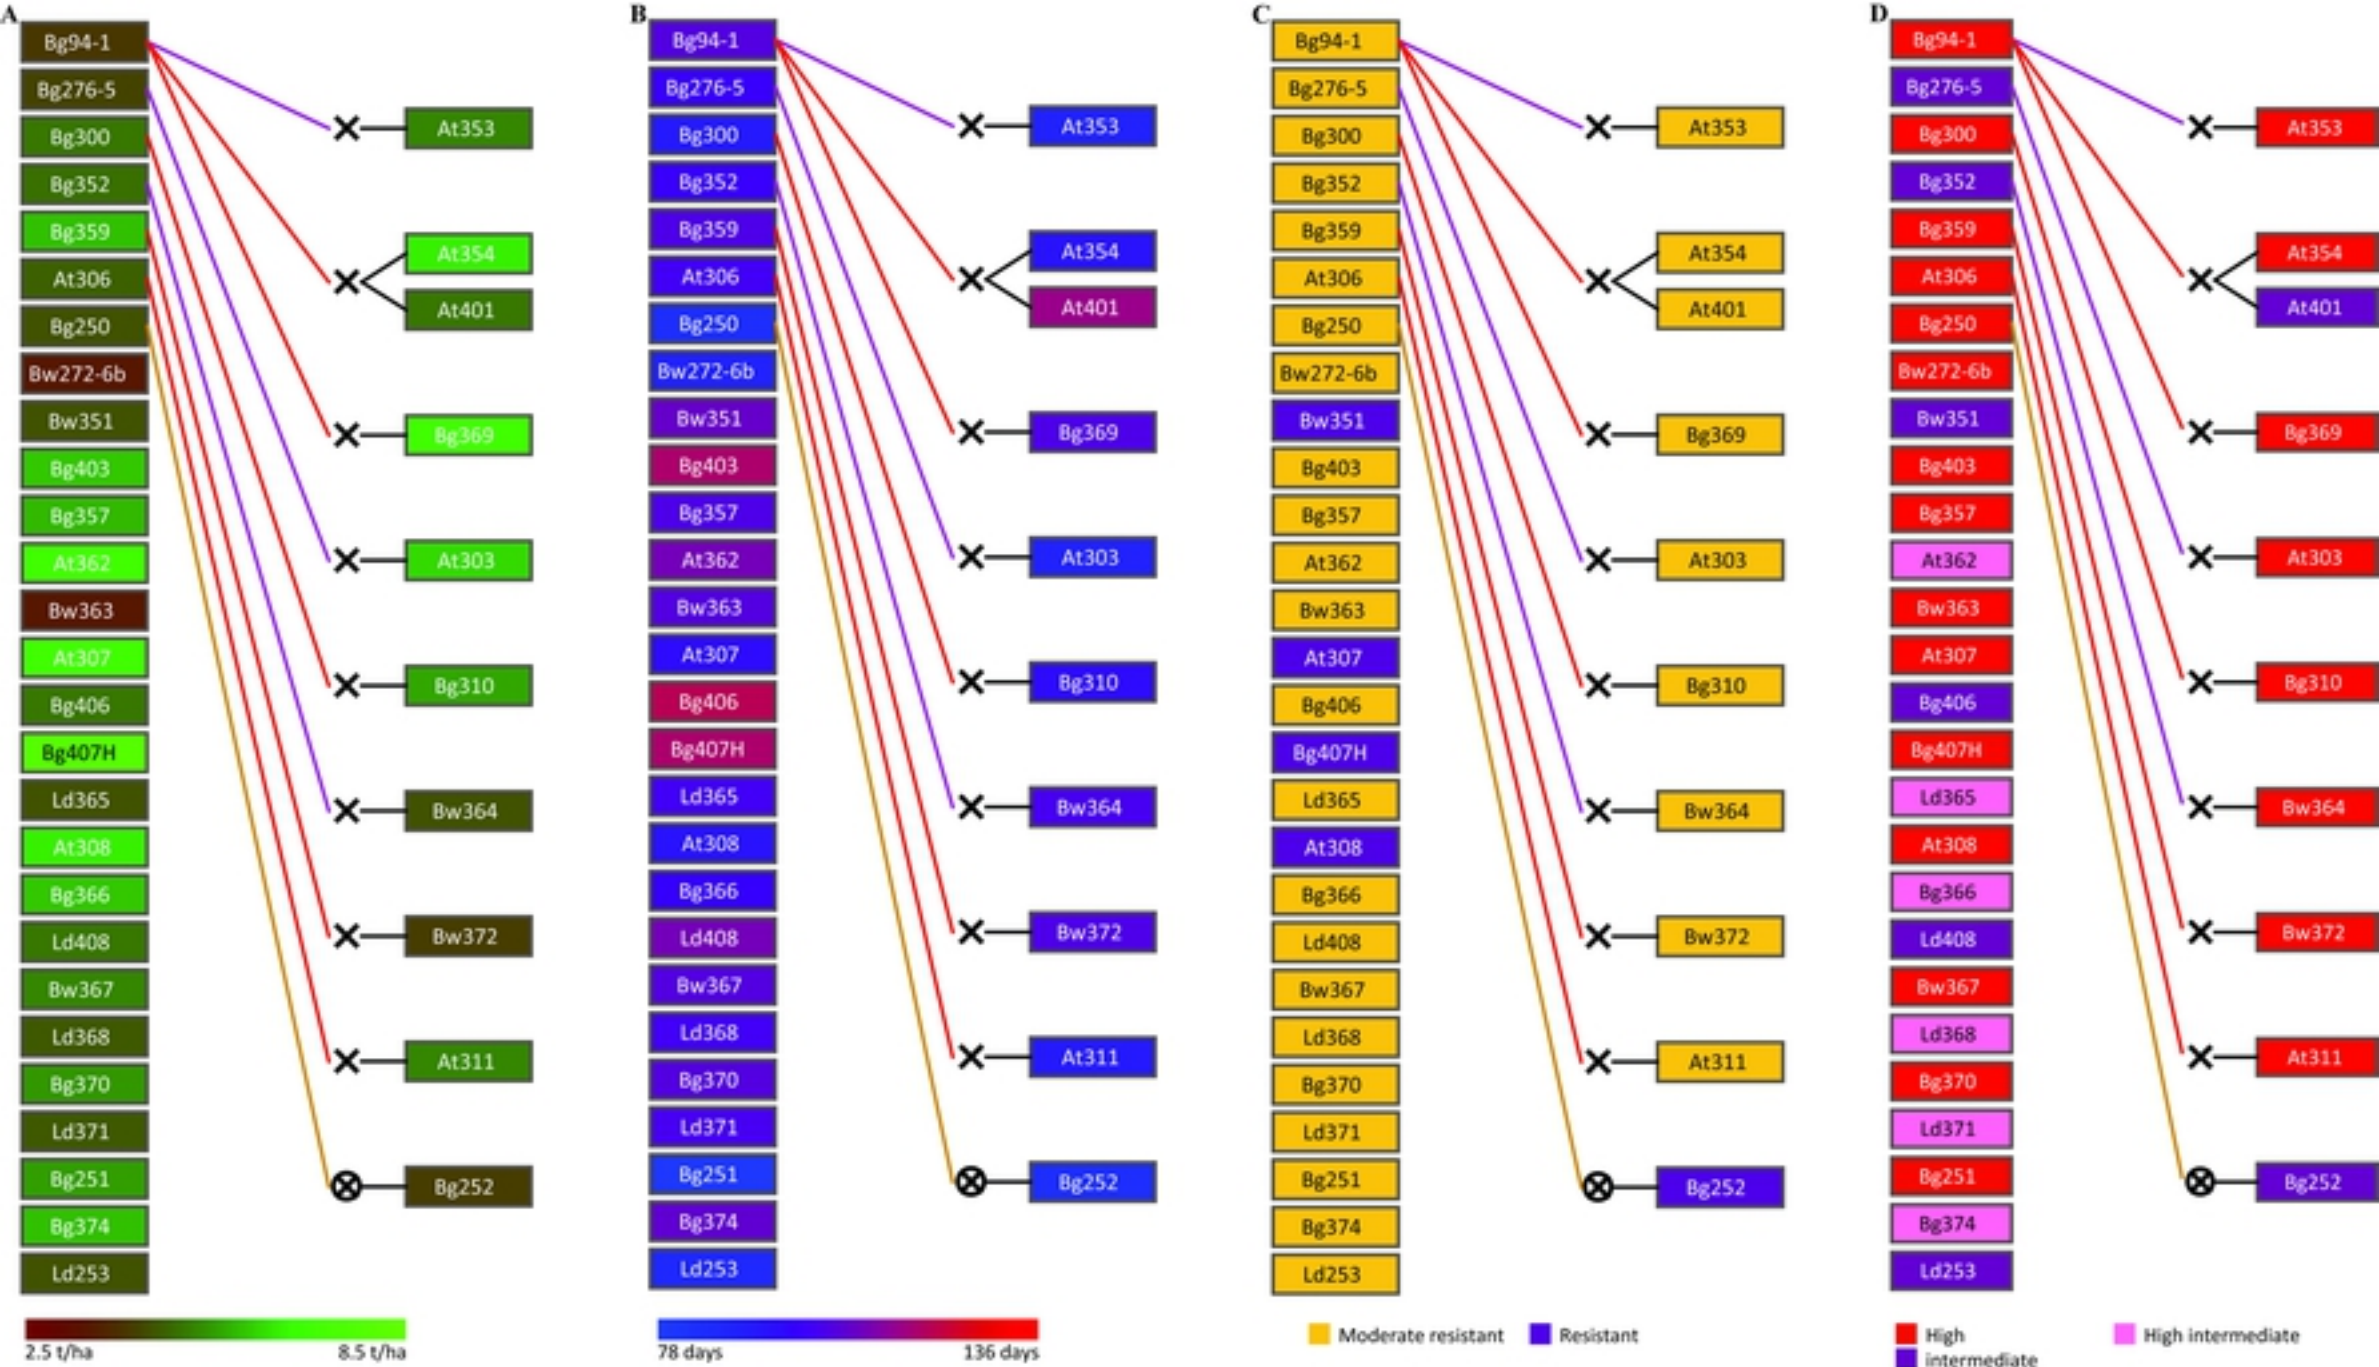

Figure 3



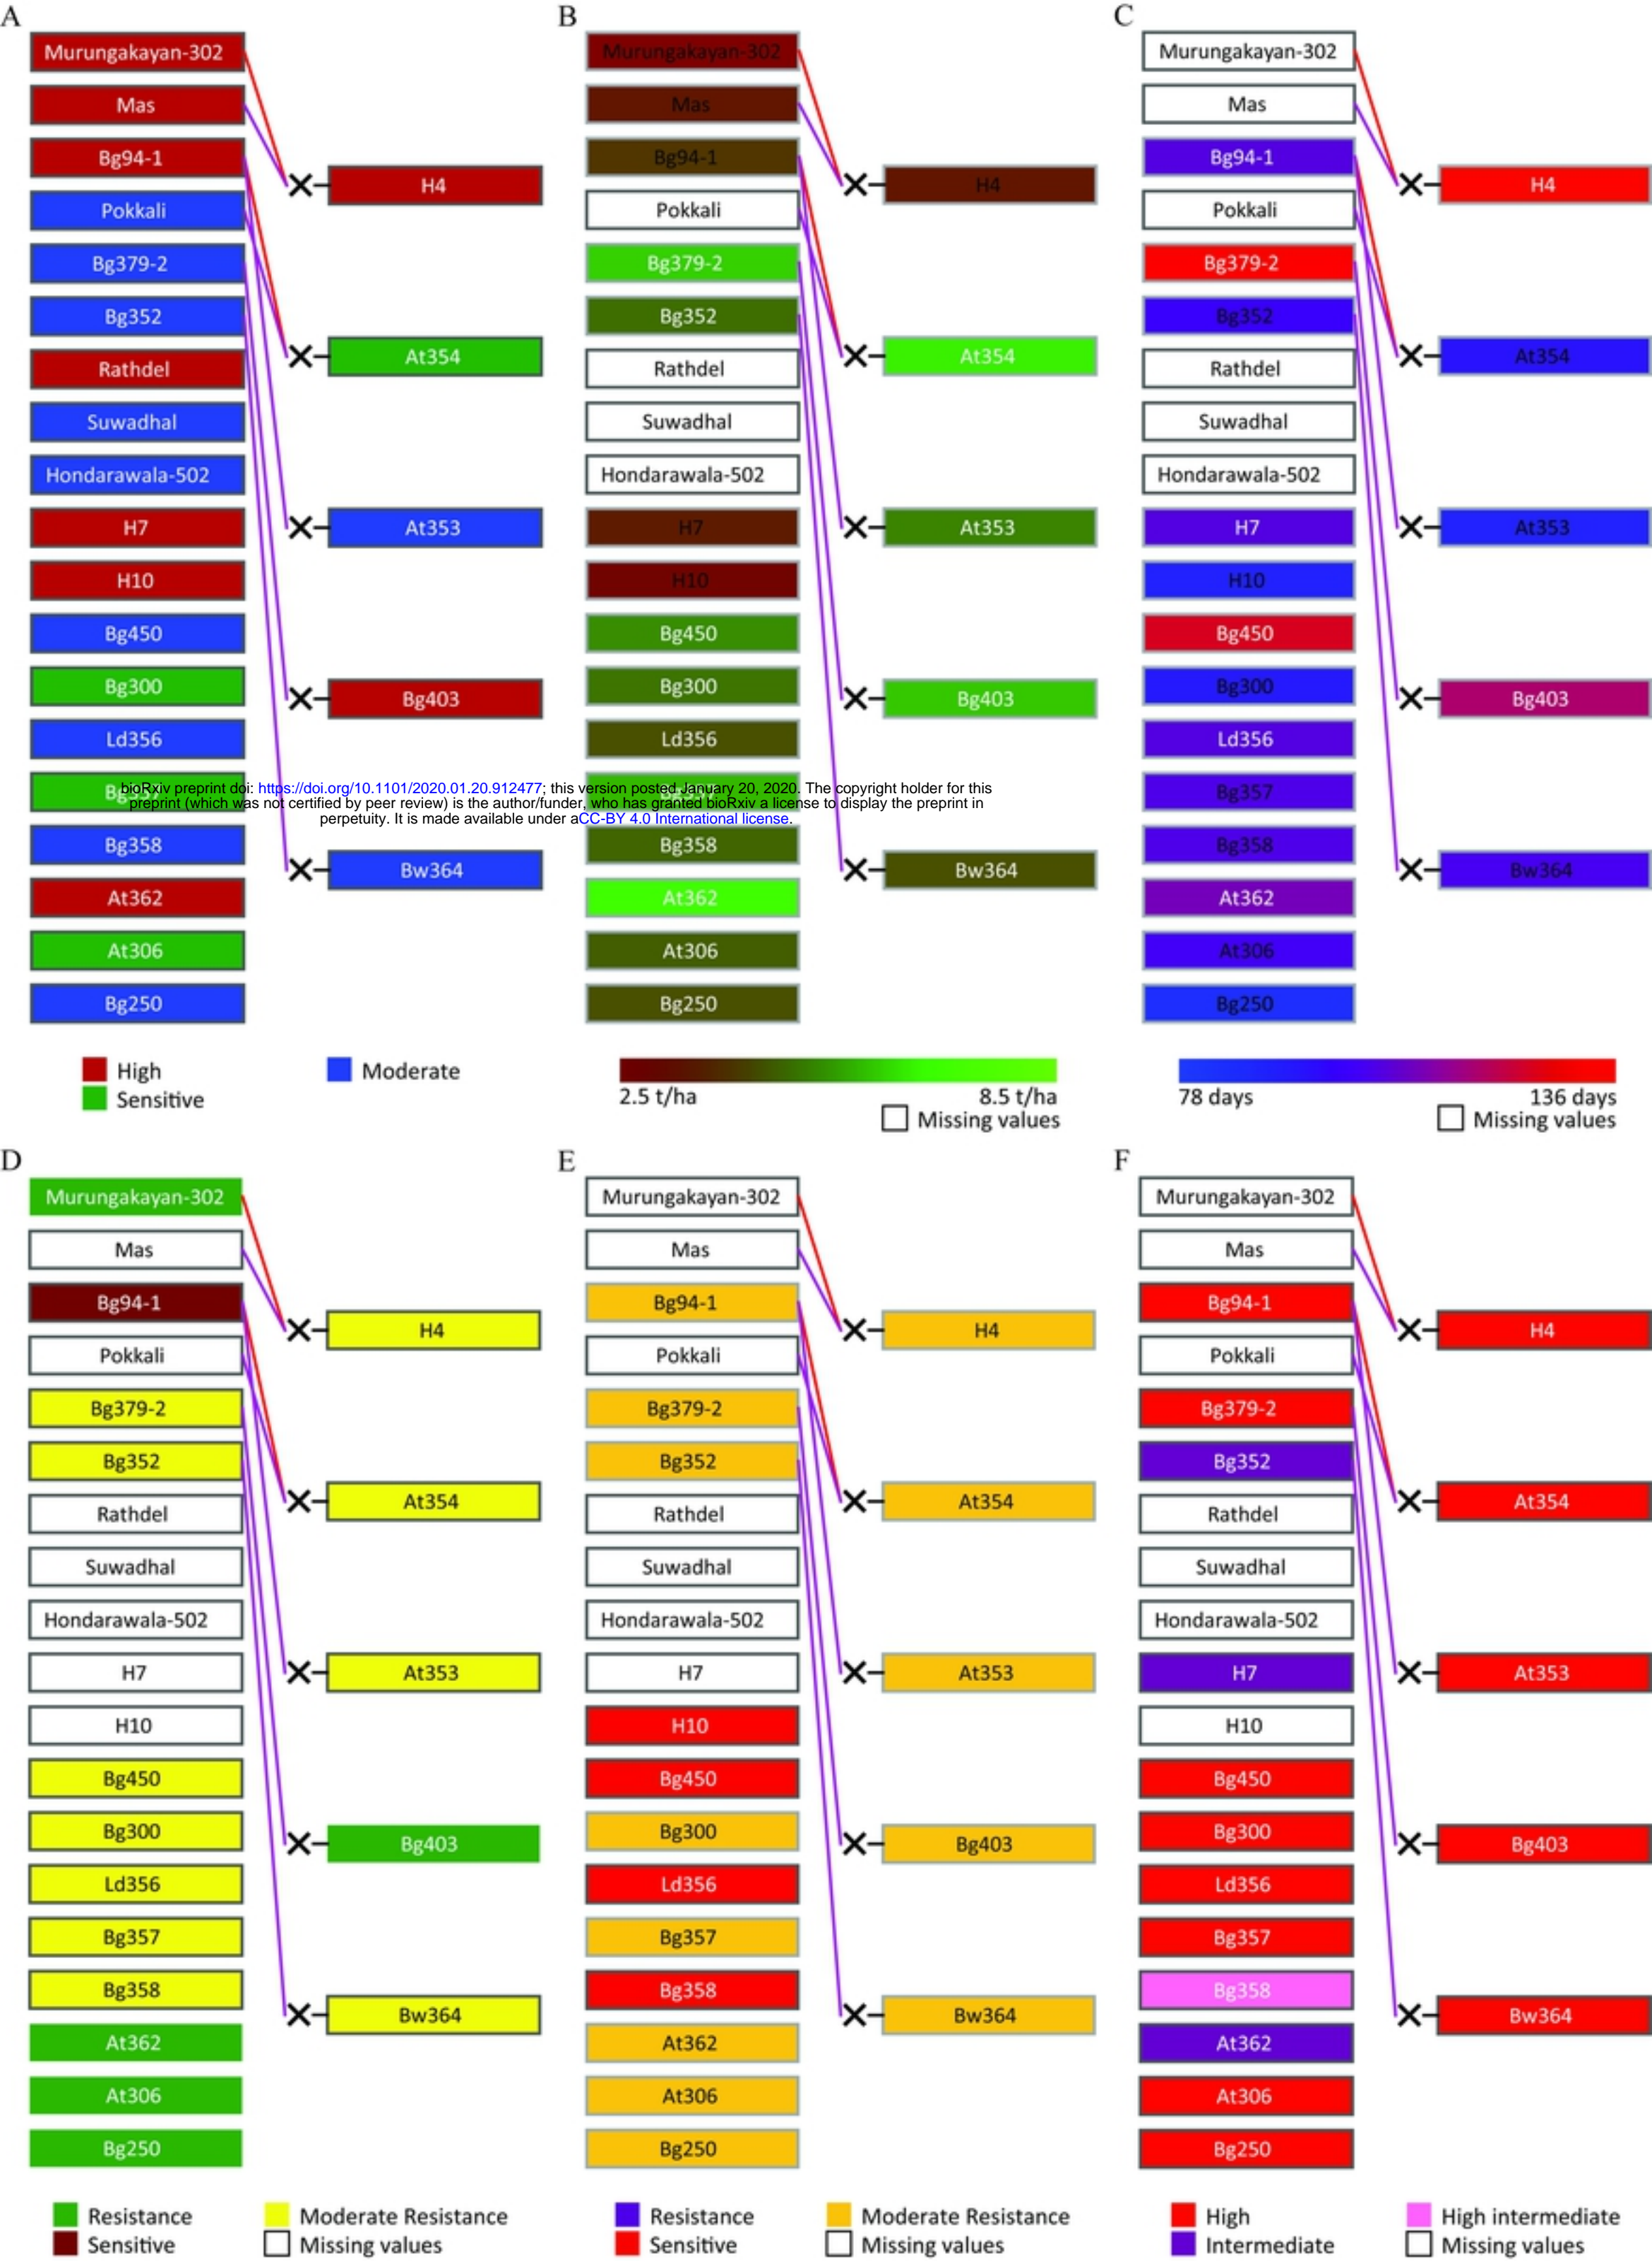

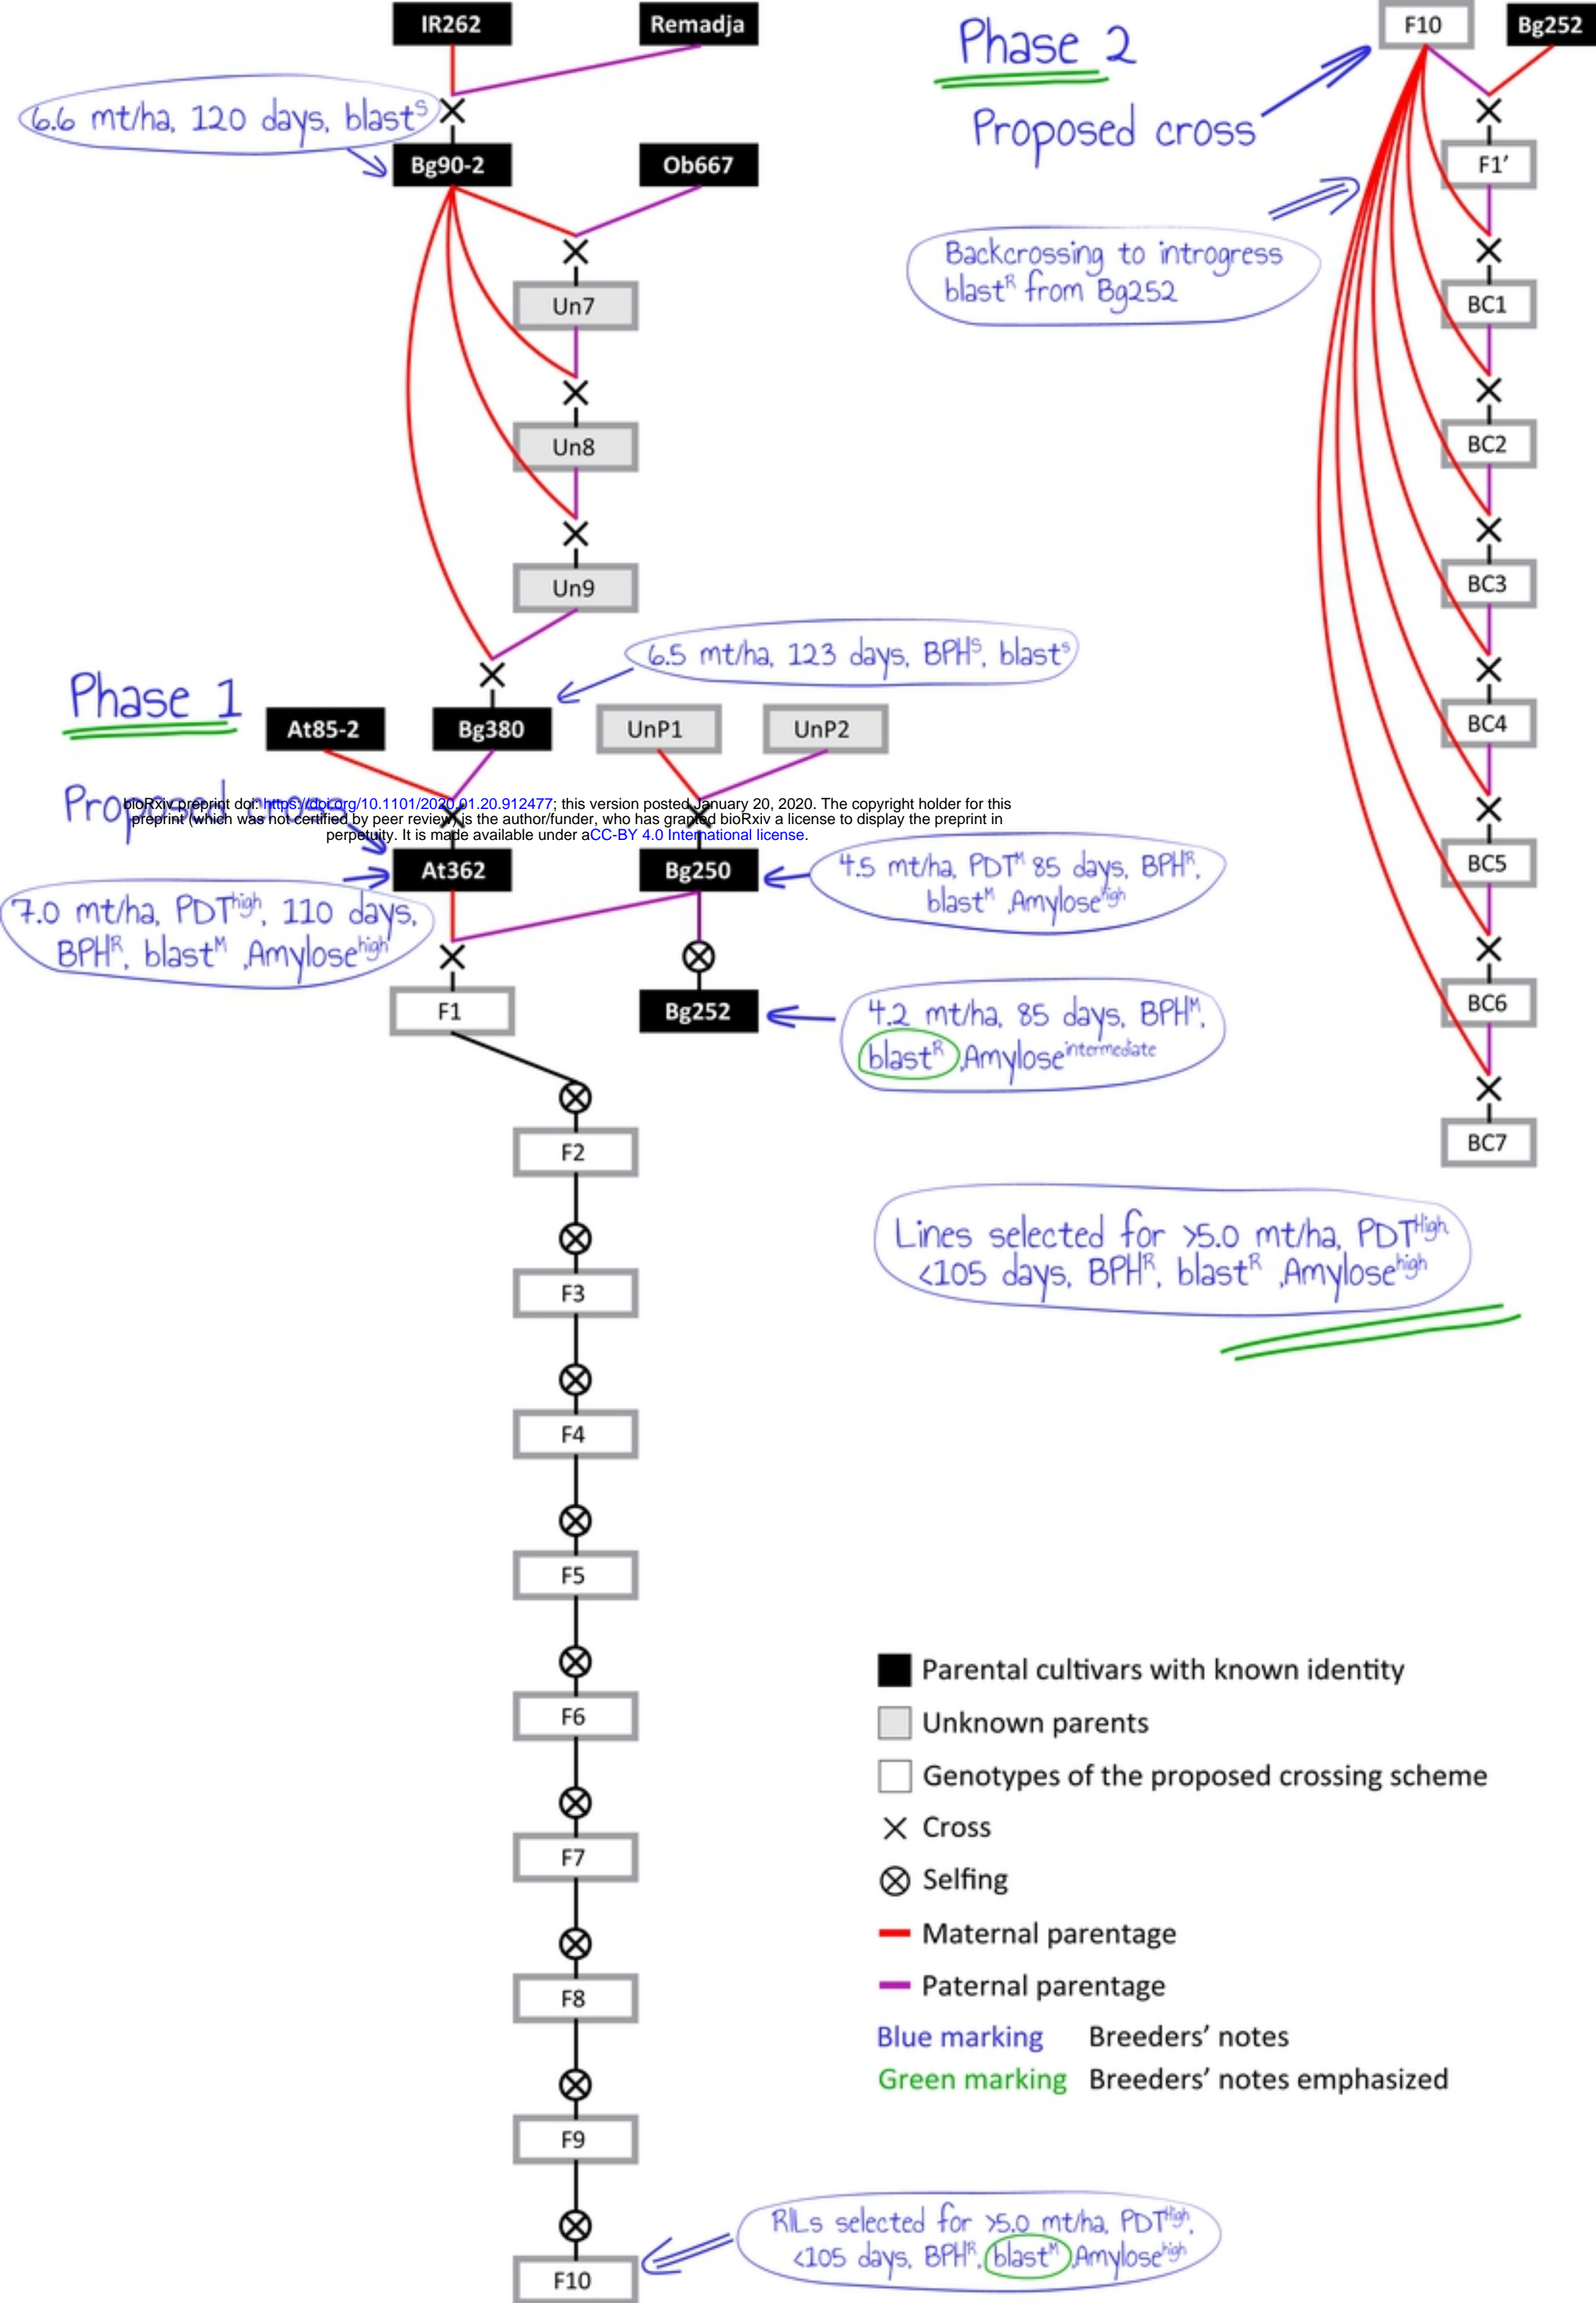

Figure 5
